# Supplementary material for: Magnetic resonance as a local probe for kagomé magnetism in Barlowite Cu4(OH)6FBr
Source: Springer Nature journal article supplement (doi:10.1038/s41598-018-29080-8), 2018-07-12
Supplement: MOESM1 [file 41598_2018_29080_MOESM1_ESM.pdf]

# Magnetic resonance as a local probe for kagomé magnetism in Barlowite $\text{Cu}_4(\text{OH})_6\text{FBr}$

K. M. Ranjith<sup>1,\*</sup>, C. Klein<sup>2</sup>, A. A. Tsirlin<sup>3</sup>, H. Rosner<sup>1</sup>, C. Krellner<sup>2,1</sup>, and M. Baenitz<sup>1</sup>

<sup>1</sup>Max-Planck-Institute for Chemical Physics of Solids, 01187 Dresden, Germany

<sup>2</sup>Physikalisches Institut, Goethe-Universität Frankfurt, 60438 Frankfurt, Germany

<sup>3</sup>Experimental Physics VI, Center for Electronic Correlations and Magnetism, Institute of Physics, University of Augsburg, 86135 Augsburg, Germany

\*ranjith.kumar@cps.mpg.de

## MAGNETIZATION

The temperature dependence of ( $1.8 \text{ K} \leq T \leq 300 \text{ K}$ ) magnetic susceptibility ( $\chi$ ) measured at different applied magnetic fields ( $H$ ) is shown in Fig. S1(a). At high temperatures,  $\chi(T)$  behaves in a Curie-Weiss manner and can be fitted by the expression

$$\chi = \chi_0 + \frac{C}{T - \theta_{\text{CW}}}$$

where  $\chi_0$  is the temperature-independent contribution consists of diamagnetism of the core electron shells ( $\chi_{\text{core}}$ ) and Van-Vleck paramagnetism ( $\chi_{\text{VV}}$ ) of the open shells of the  $\text{Cu}^{2+}$  ions present in the sample. The second term is the Curie-Weiss (CW) law with the Curie-Weiss temperature ( $\theta_{\text{CW}}$ ) and curie constant  $C = N_A \mu_{\text{eff}}^2 / 3k_B$ , where  $N_A$  is Avogadro's number,  $k_B$  is the Boltzmann constant, and  $\mu_{\text{eff}}$  is the effective moment. The expression for effective moment is given by  $\mu_{\text{eff}} = g \sqrt{S(S+1)} \mu_B$  where  $g$  is the Landé g-factor and  $S$  is the spin quantum number. Our fit to the 0.1 T data [Fig. S1(b)] in the high temperature regime yields  $\chi_0 \simeq -1.19 \times 10^{-6} \text{ cm}^3/\text{mol}$ ,  $C \simeq 0.45 \text{ cm}^3\text{K}/\text{mol}$ , and  $\theta_{\text{CW}} \simeq -145 \text{ K}$ . The effective moment was calculated to be  $\mu_{\text{eff}} \simeq 1.9 \mu_B/\text{Cu}$ . These values are in good agreement with the reported values.[1]

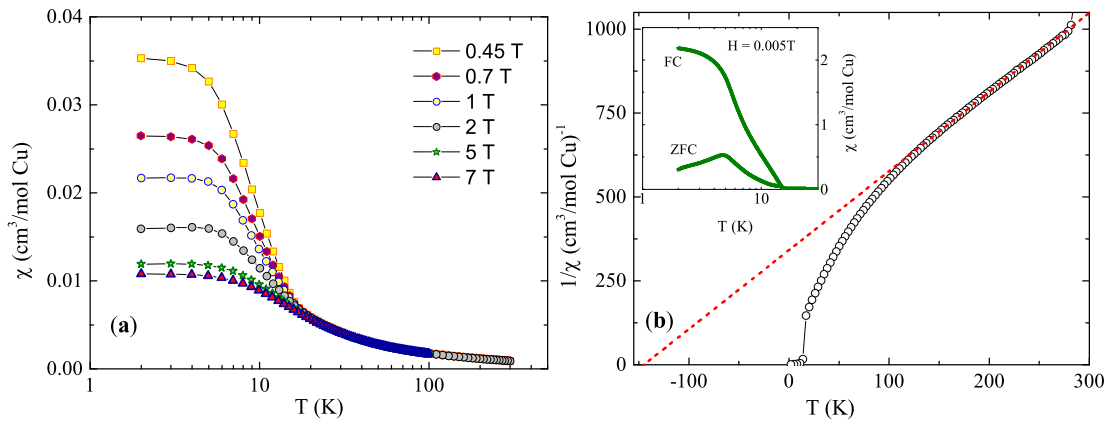

**Fig. S1.** (Color online) (a) The temperature dependence of magnetic susceptibility ( $\chi$ ) measured at different applied field. (b) Inverse magnetic susceptibility  $1/\chi$  at 0.1 T and the solid line is the Curie-Weiss fit. The inset shows the field-cooled and zero-field-cooled susceptibility measured at 0.05 T

At low temperatures ( $1.8 \text{ K} \leq T \leq 30 \text{ K}$ ) zero-field-cooled (ZFC) and field-cooled (FC) magnetic susceptibility was measured at an applied field of 0.005 T. As shown in the inset of Fig. S1(b), the ZFC-FC data shows a clear splitting at 15 K which indicates a phase transition to a long-range ordered state with a small ferromagnetic moment. Isothermal magnetization  $M(H)$  measured at different temperatures are shown in Fig. S2. It shows a hysteresis below  $T_N$  due to the interkagome Cu or Dzyaloshinskii-Moriya interaction (DMI).

## REFERENCES

1. Han, T.-H., Singleton, J. & Schlueter, J. A. Barlowite: A spin-1/2 antiferromagnet with a geometrically perfect kagome motif. *Phys. Rev. Lett.* **113**, 227203 (2014).

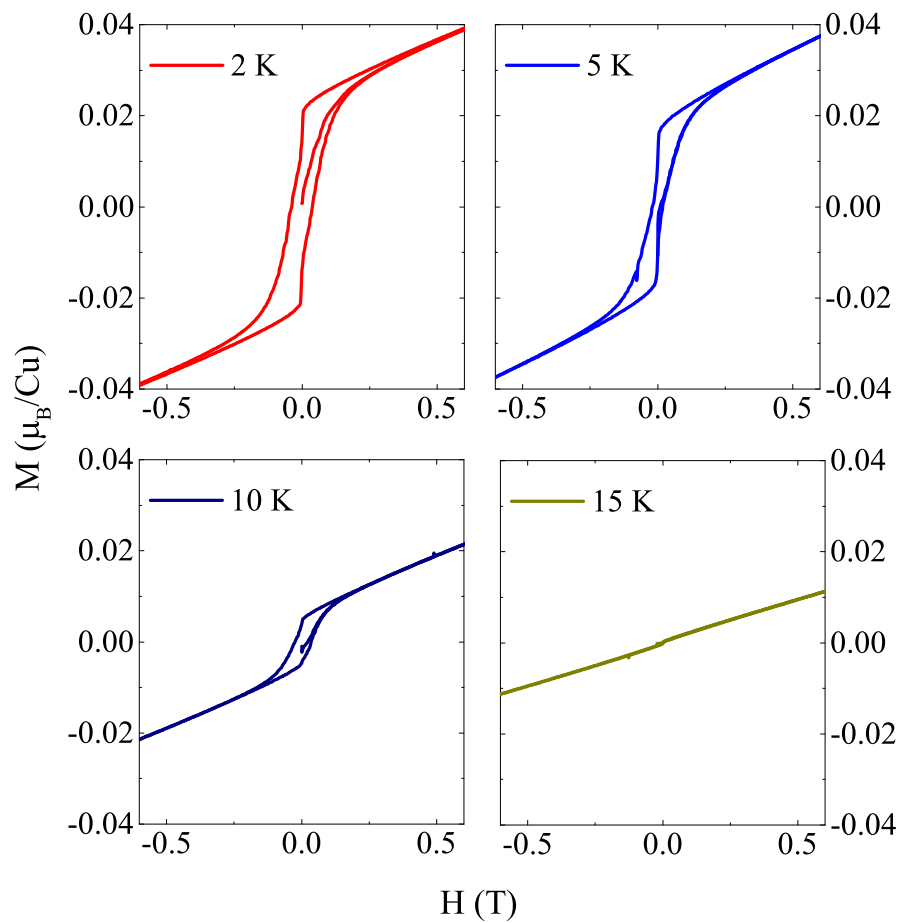

**Fig. S2.** (Color online) Magnetization isotherms ( $M$  vs.  $H$ ) of measured at different temperatures.
